# Supplementary material
Source: Research Square preprint supplement (doi:10.21203/rs.3.rs-9195969/v1)

Supplementary table1: Probes used for qRT-PCR

| Name | Assay ID | Company |
| --- | --- | --- |
| ACTB(mouse) | Mm02619580_g1 | Thermo Fisher Scientific |
| ACTA2(mouse) | Mm00725412_s1 | Thermo Fisher Scientific |
| COL1A1(mouse) | Mm00801666_g1 | Thermo Fisher Scientific |
| FN1(mouse) | Mm01256744_m1 | Thermo Fisher Scientific |
| GAPDH(human) | Hs02786624_g1 | Thermo Fisher Scientific |
| ACTA2(human) | Hs04406862_m1 | Thermo Fisher Scientific |
| COL1A1(human) | Hs00164004_m1 | Thermo Fisher Scientific |
| FN1(human) | Hs01549976_m1 | Thermo Fisher Scientific |

**Supplementary figure legends**

SFig.1

**A**: Flow cytometry analysis demonstrating successful membrane dye labeling of E13D and E17F EVs. Gating was set based on unstained EV controls. Fluorescence intensity in the R670-H channel was increased compared with unstained controls.

**B**: A dye-only control was prepared by processing PBS without EVs through the same labeling and centrifugation procedure used for EV labeling, and the resulting solution was added to recipient fibroblasts. EV-derived fluorescence was detected in the red channel in uptake experiments; however, no detectable red fluorescence was observed in this control under identical imaging settings. Nuclei were stained with DAPI (blue), actin fibers with phalloidin (green). Scale bar = 10 µm.

**C**: Representative immunofluorescence images showing uptake of membrane dye-labeled E17F EVs (red) by E17F fibroblasts and keloid fibroblasts. Nuclei were stained with DAPI (blue), actin fibers with phalloidin (green). Scale bar = 10 µm.

**D**: Additional representative images showing uptake of membrane dye–labeled E13D EVs and E17F EVs by fibroblasts under identical experimental conditions as shown in Fig.1F and SFig.1B. Nuclei were stained with DAPI (blue) and F-actin with phalloidin (green). Scale bar = 10 µm.

SFig.2

**A-C**: Representative immunofluorescence images and quantitative analysis of E17F fibroblasts treated with TGF-β1 and E13D EVs at 1.0 × 10³ particles/cell, 3.0 × 10³ particles/cell or 1.0 × 10⁴ particles/cell. Control cells were left untreated, without the addition of either TGF-β1 or EVs. Nuclei were stained with DAPI (blue), actin fibers with phalloidin (green), and the fibrotic marker α-SMA with a specific antibody (red). Scale bar = 10 µm.

**D-F**: Representative immunofluorescence images and quantitative analysis of E17F fibroblasts treated with TGF-β1 and either E13D EVs or E17F EVs. Control cells were left untreated, without the addition of either TGF-β1 or EVs. Nuclei were stained with DAPI (blue), actin fibers with phalloidin (green), and the fibrotic marker α-SMA with a specific antibody (red). Scale bar = 10 µm.

SFig.3

A: Size distribution of AdF EVs and Keloid EVs, as determined by NTA.

B-D: Relative mRNA expression levels of fibrotic markers (ACTA2, COL1A1, and FN1) in keloid fibroblasts treated with TGF-β1 and/or EVs. Statistical analysis was performed using one-way ANOVA (*p < 0.05, **p<0.01).

Supplementary Fig.1

A


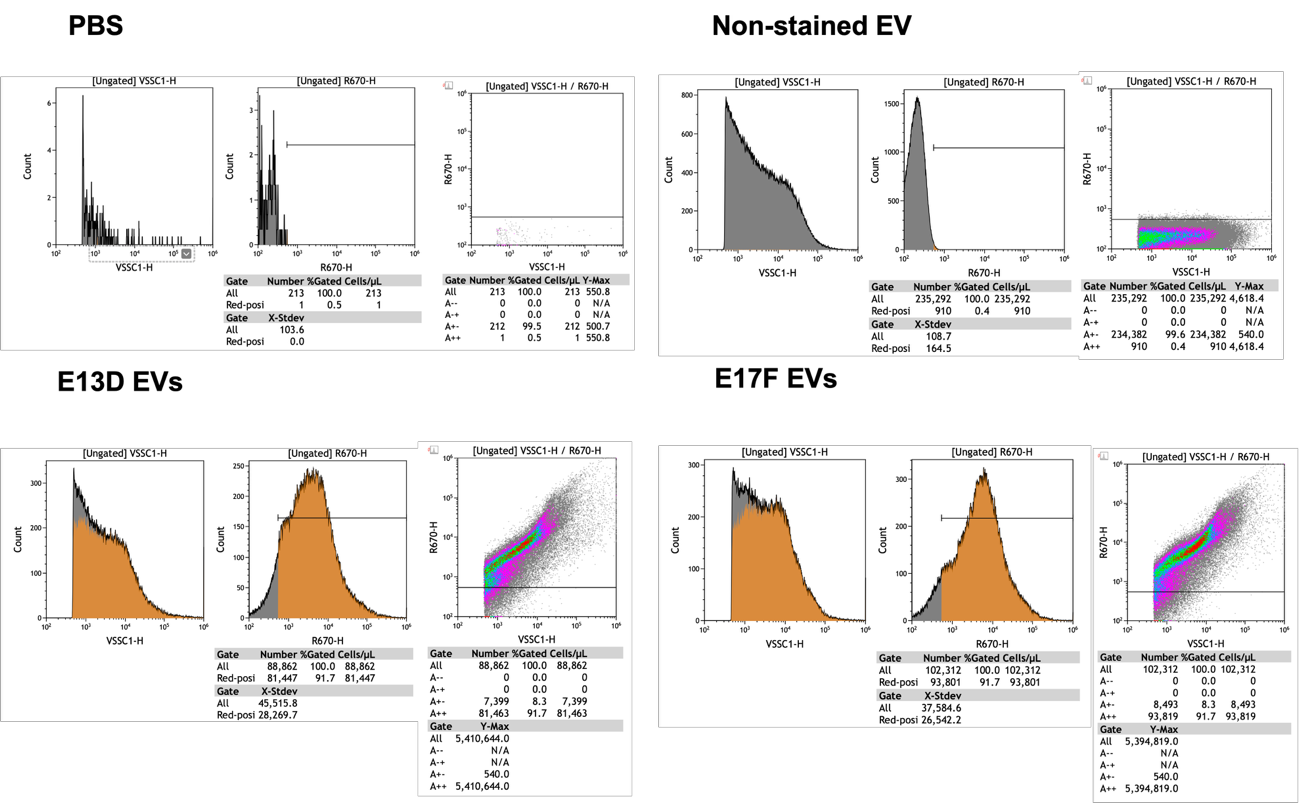


B


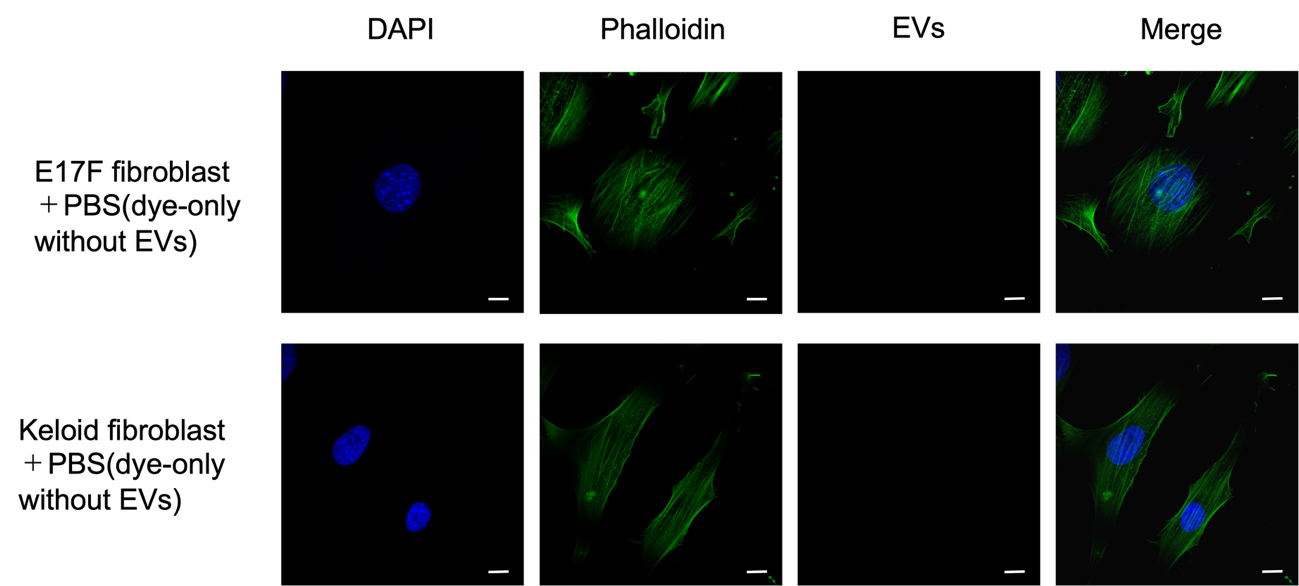


C


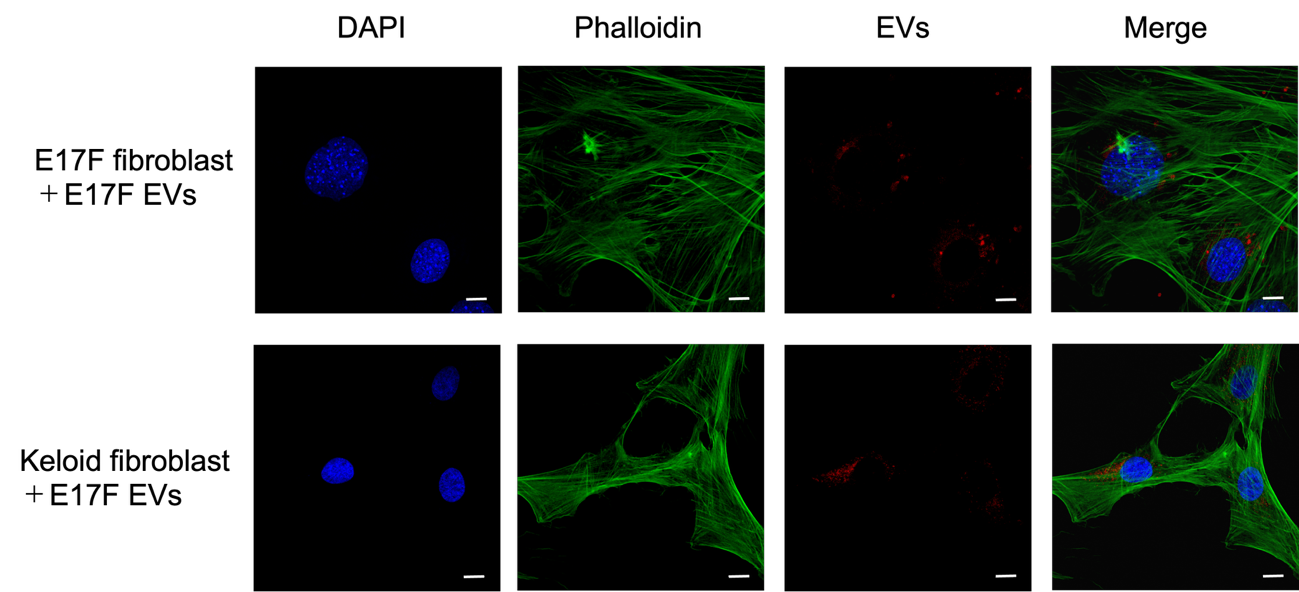


D


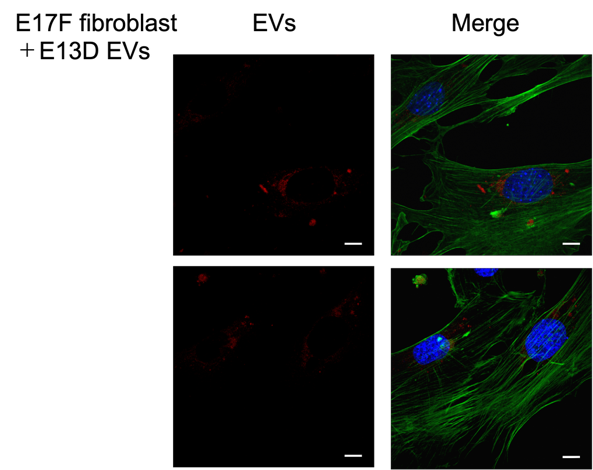

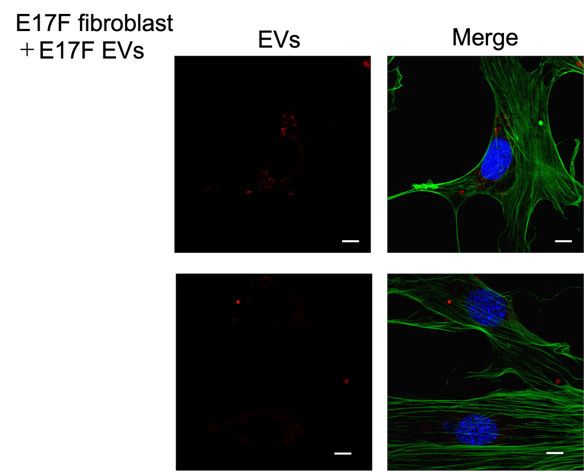

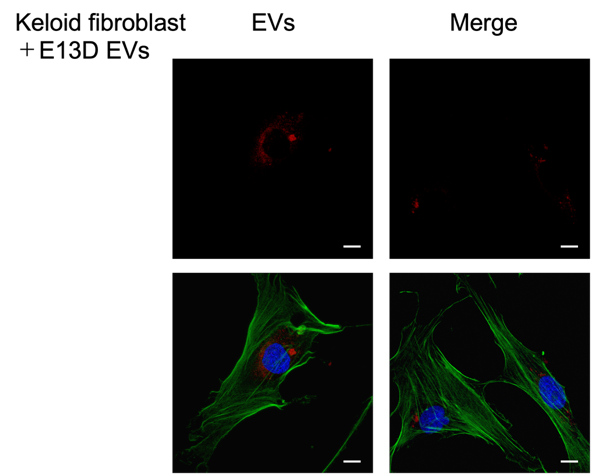

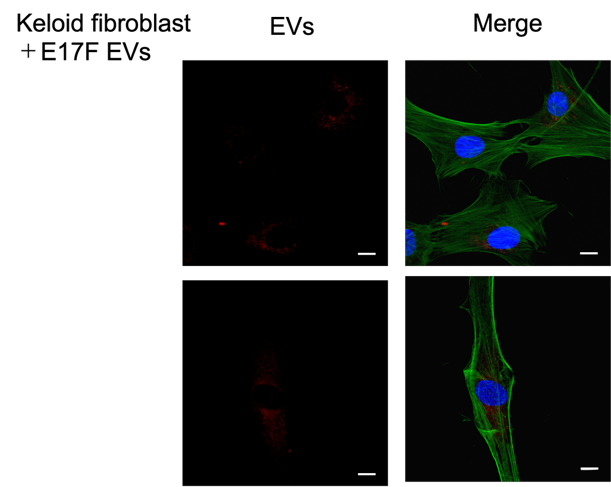


Supplementary Fig.2

**A**

**
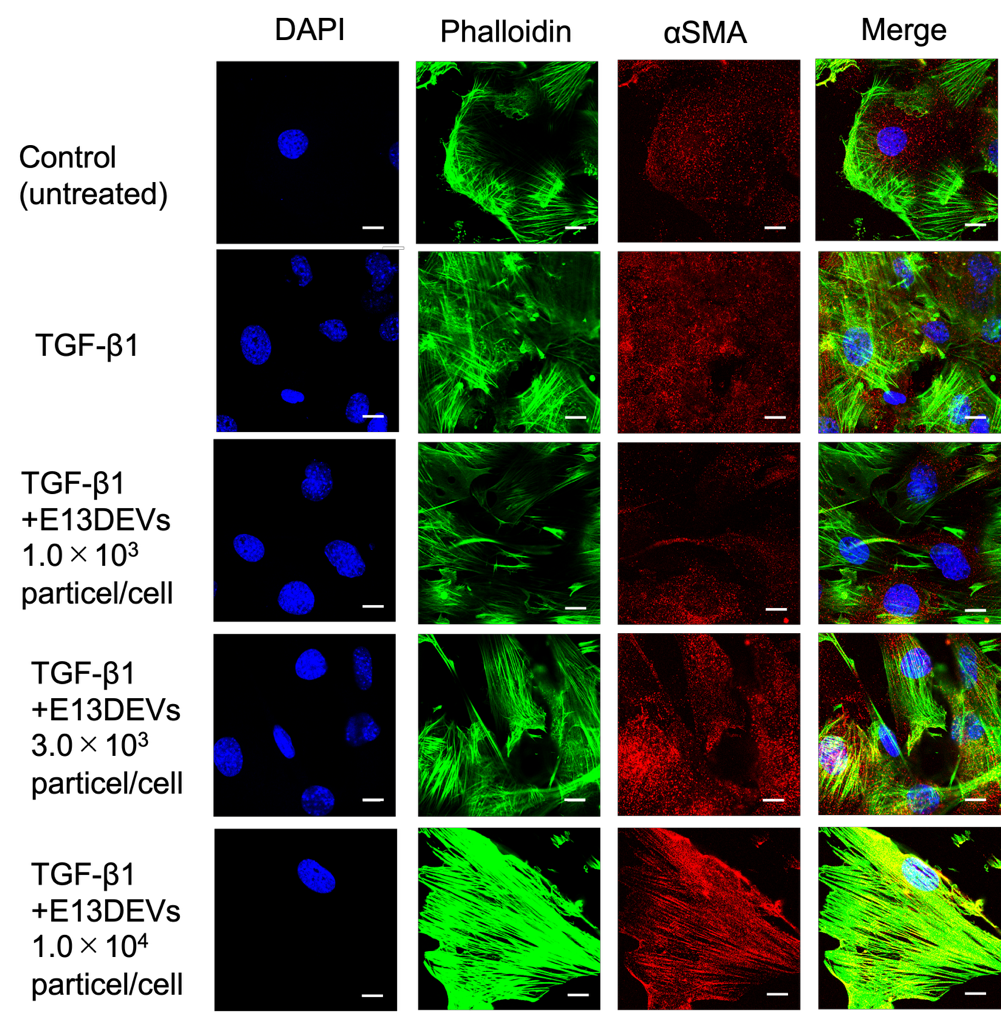
**

**B C**

**
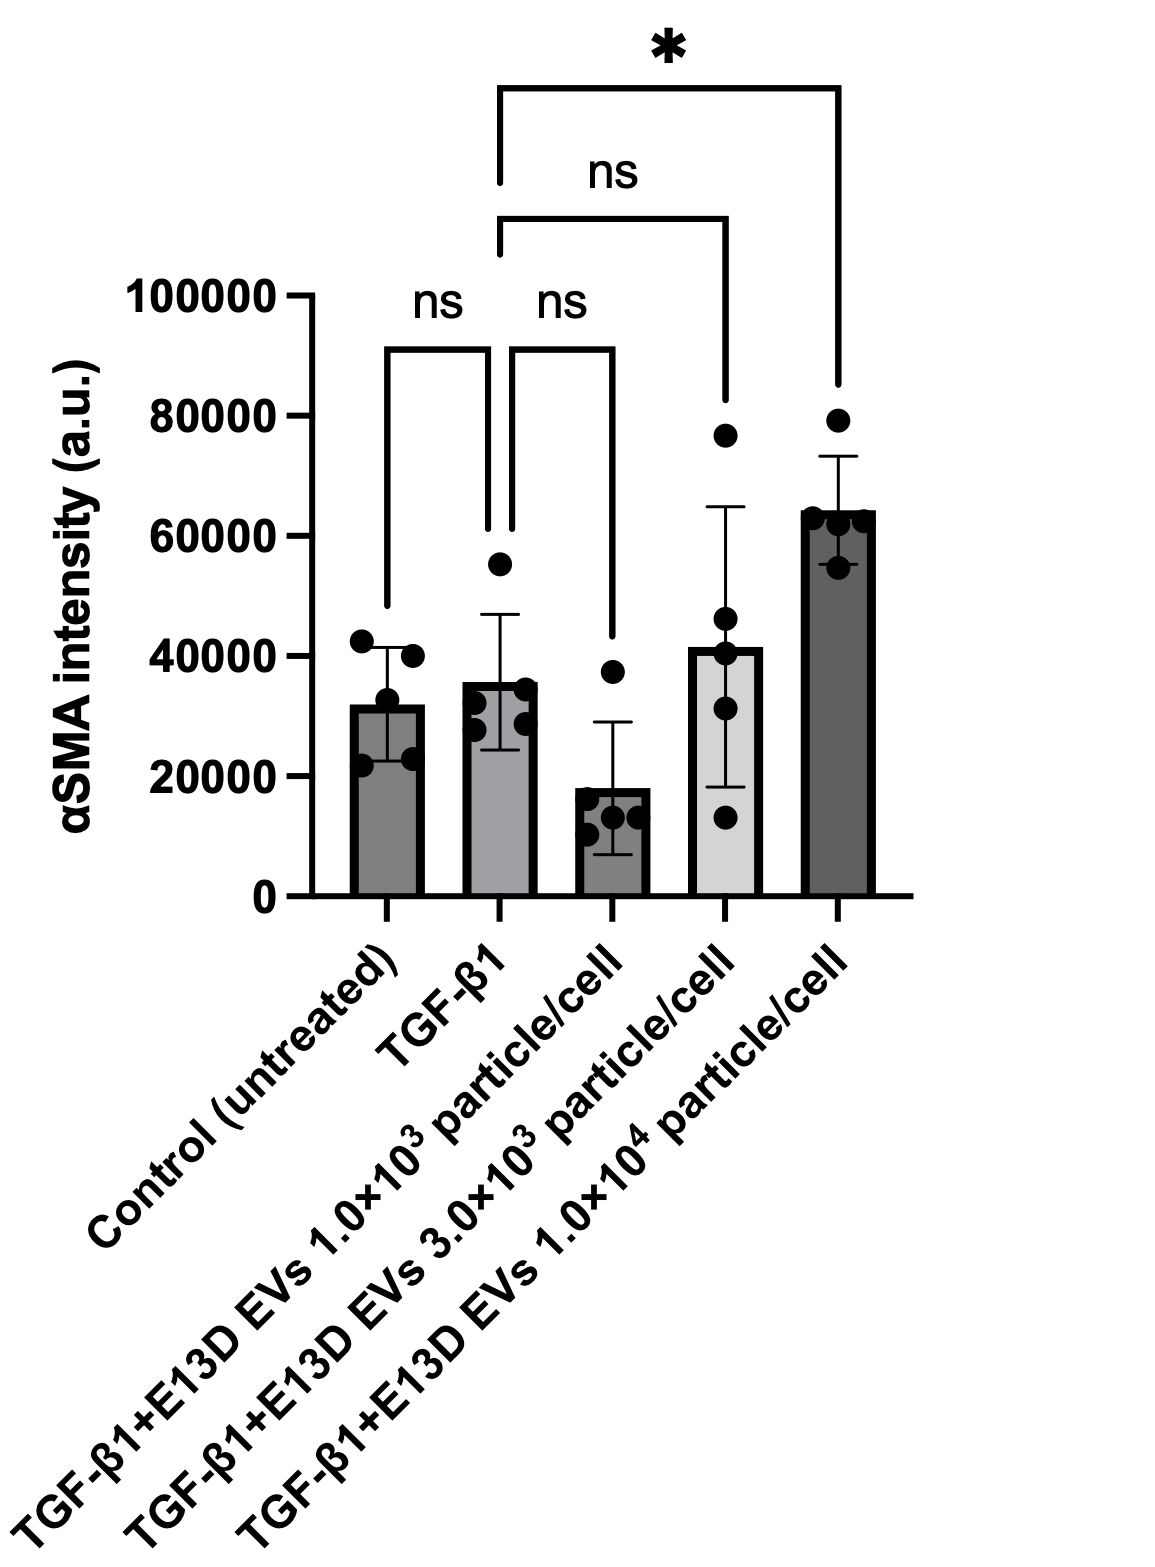

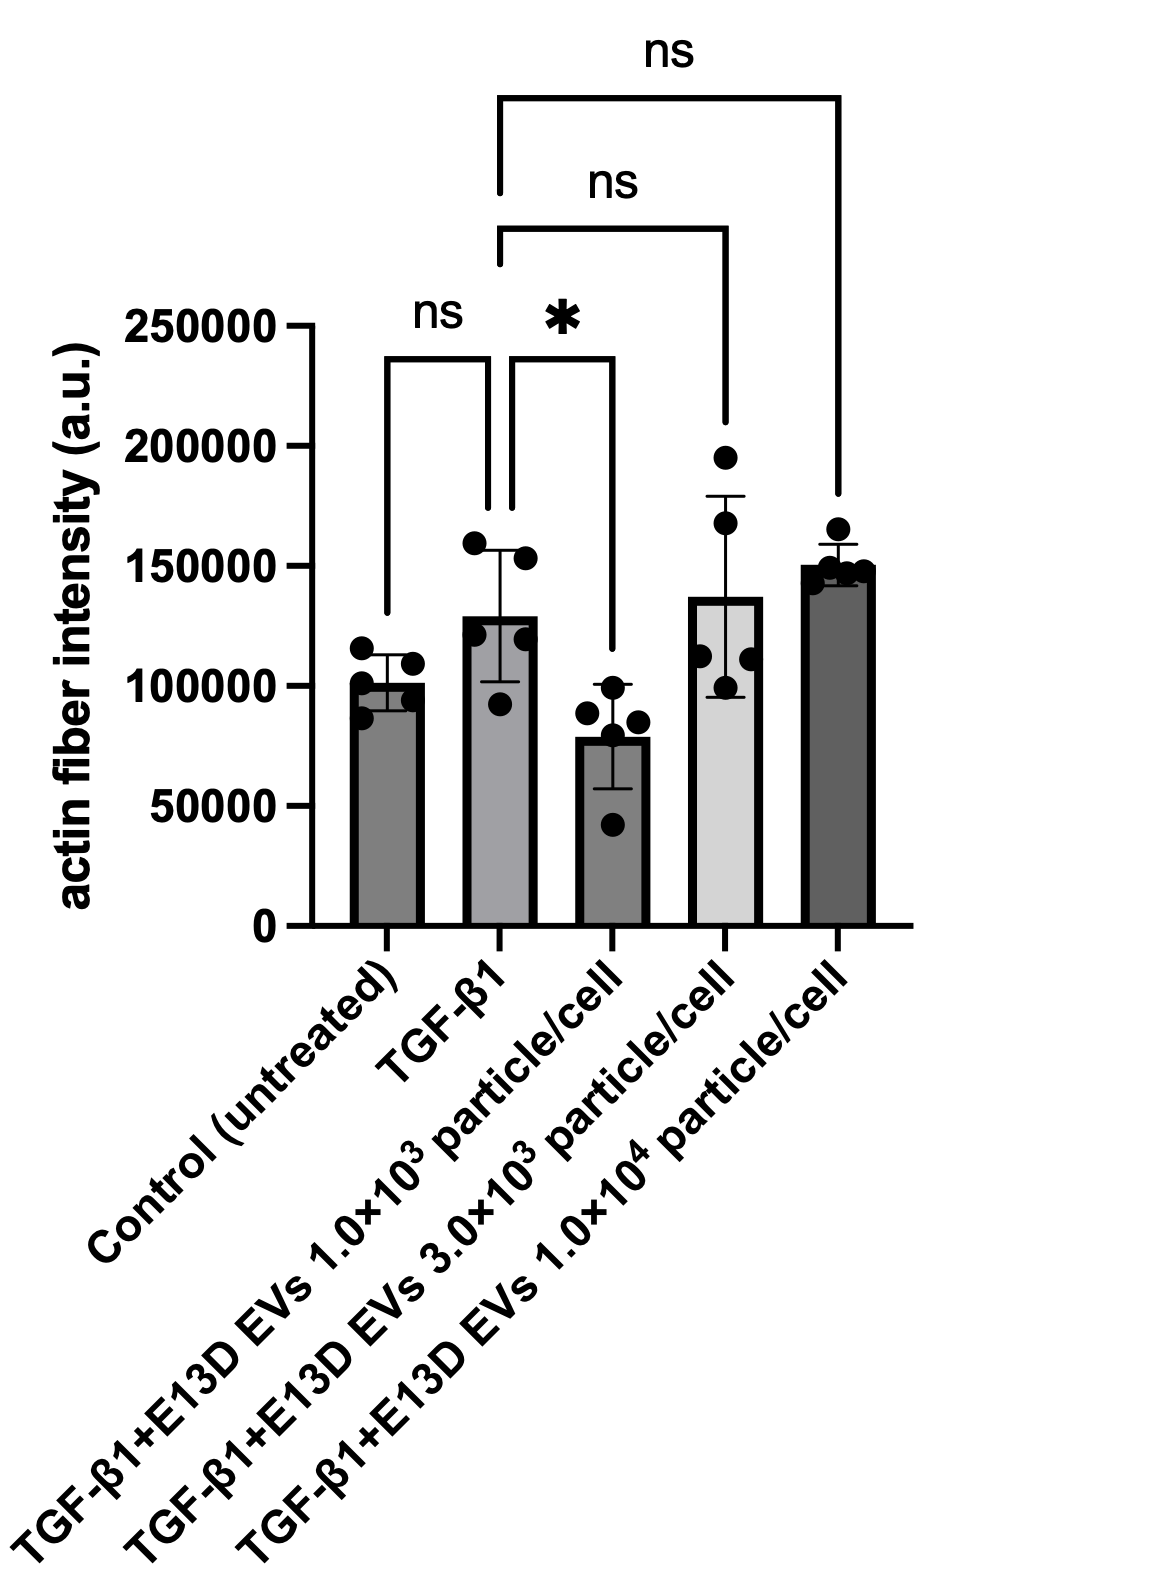
**

**D**

**
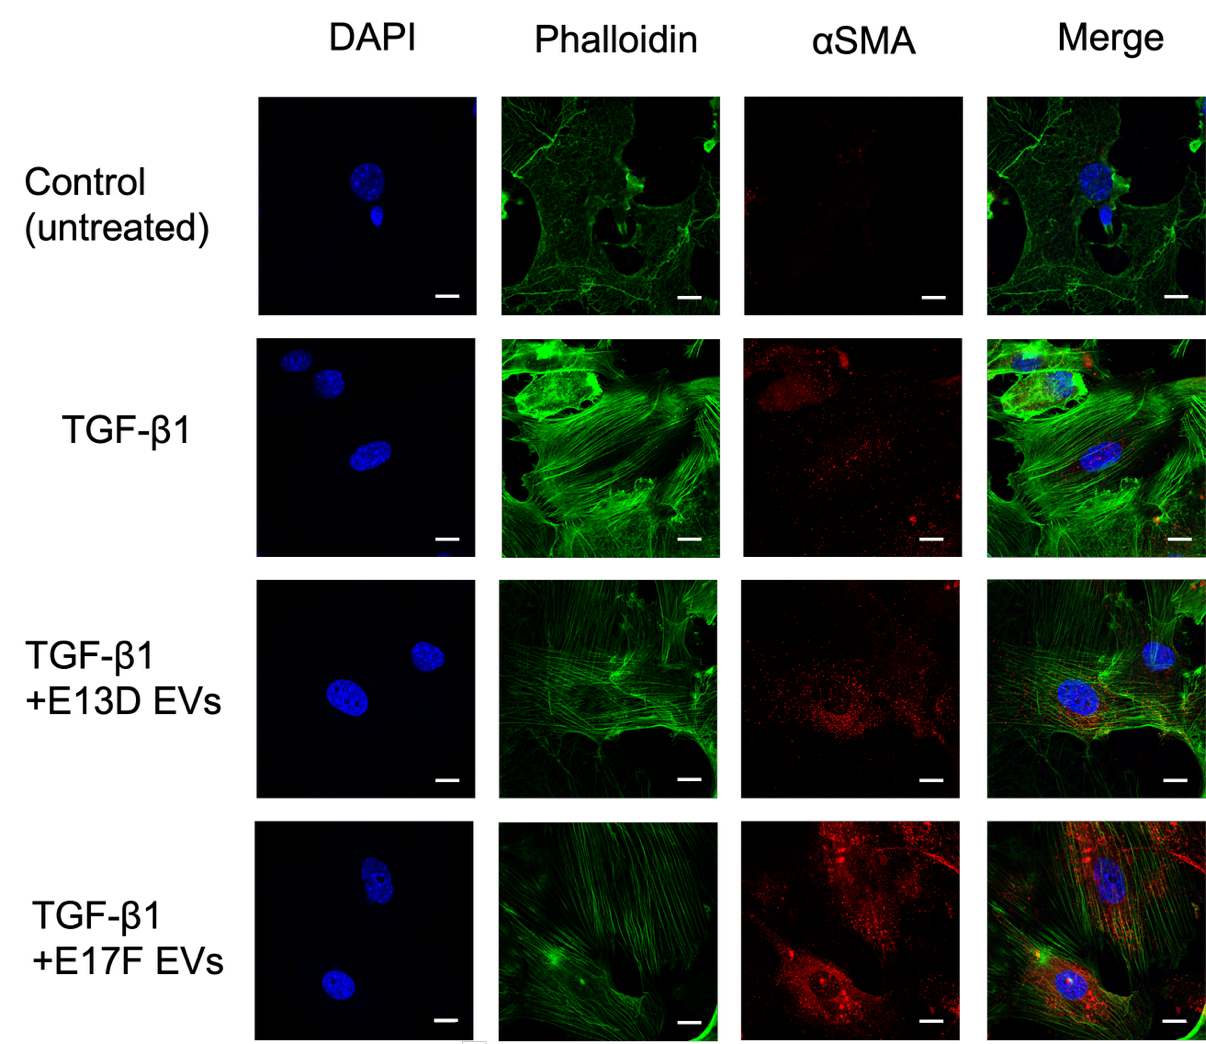
**

**E F**

**
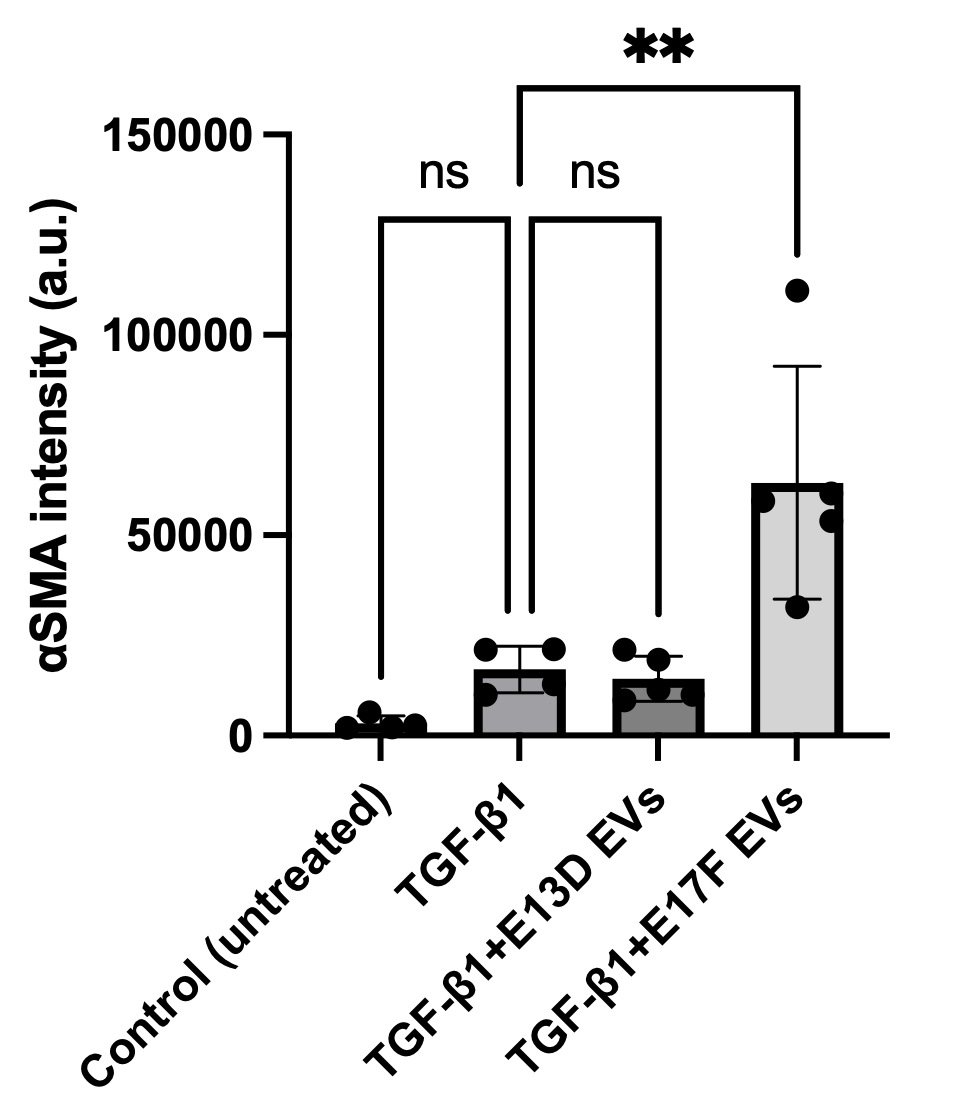

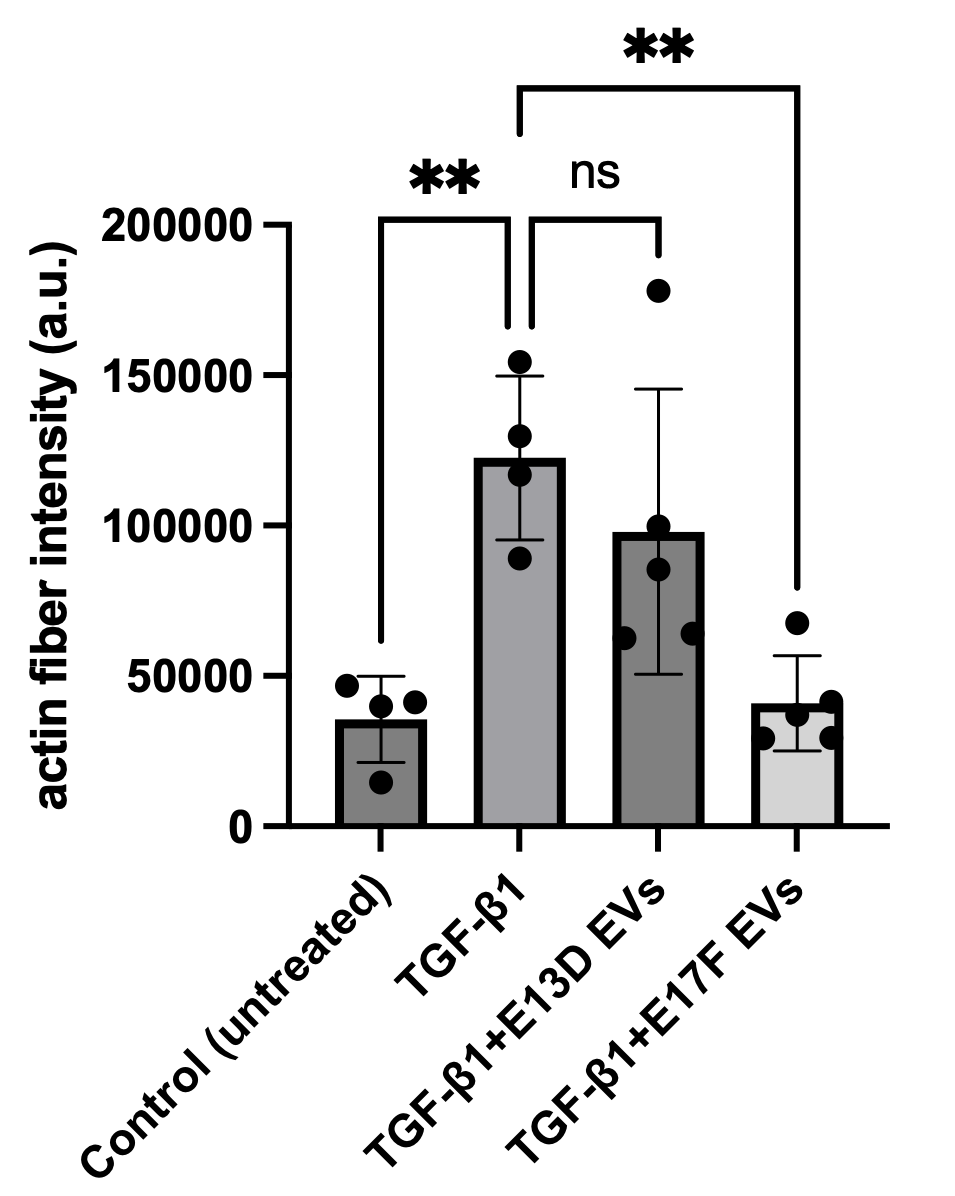
**

Supplementary Fig.3

A


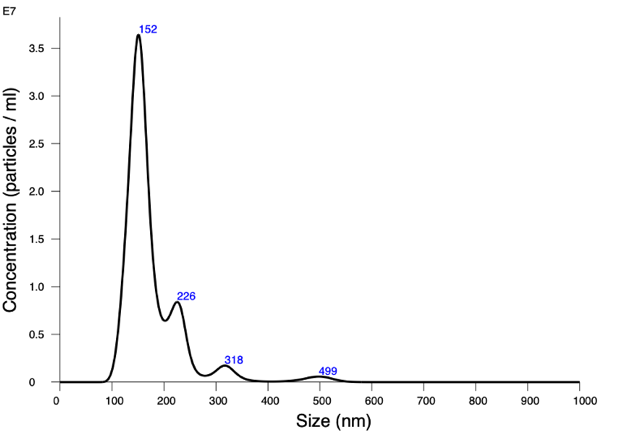

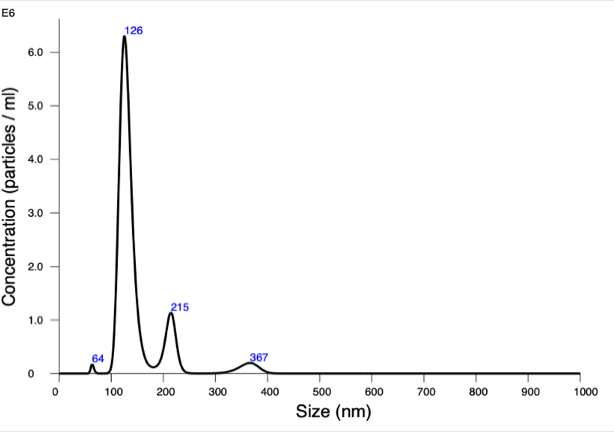


AdF EVs Keloid EVs

**B C D**


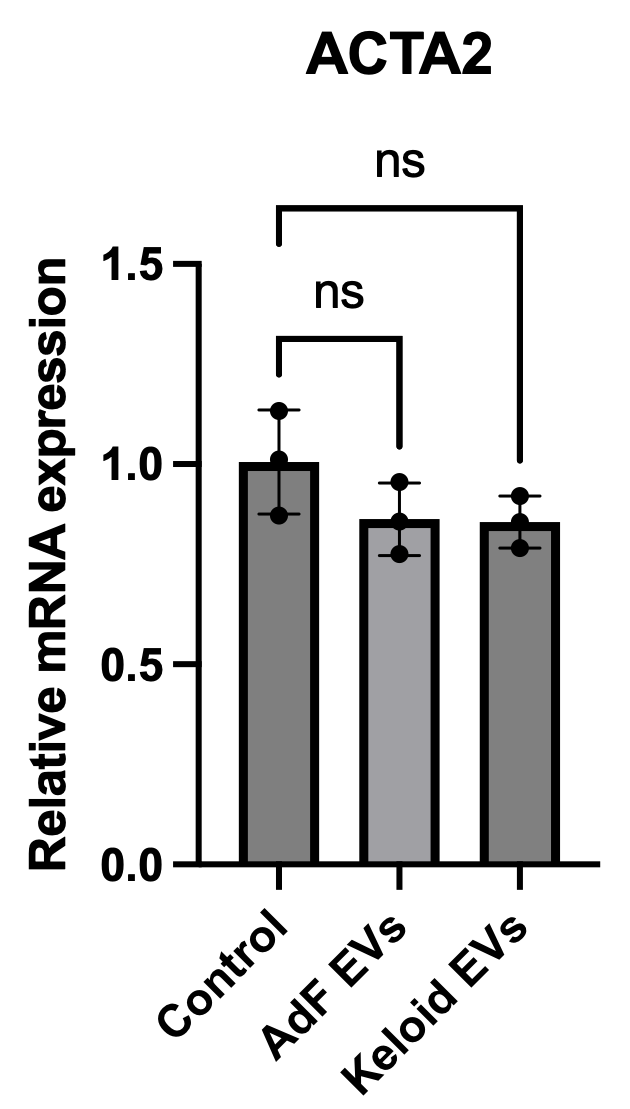

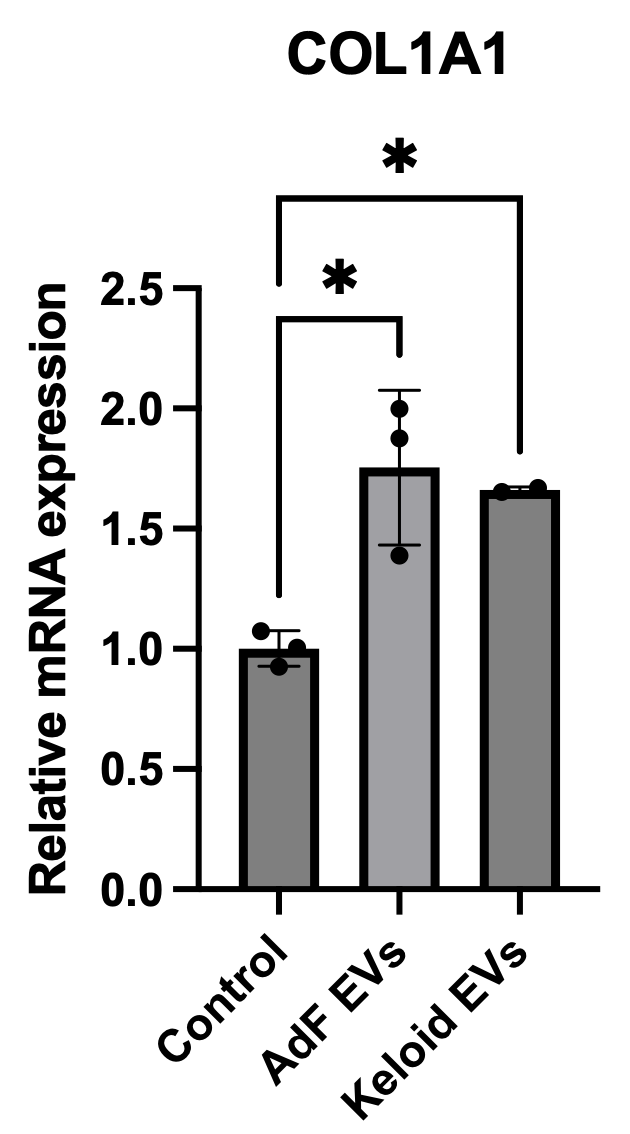

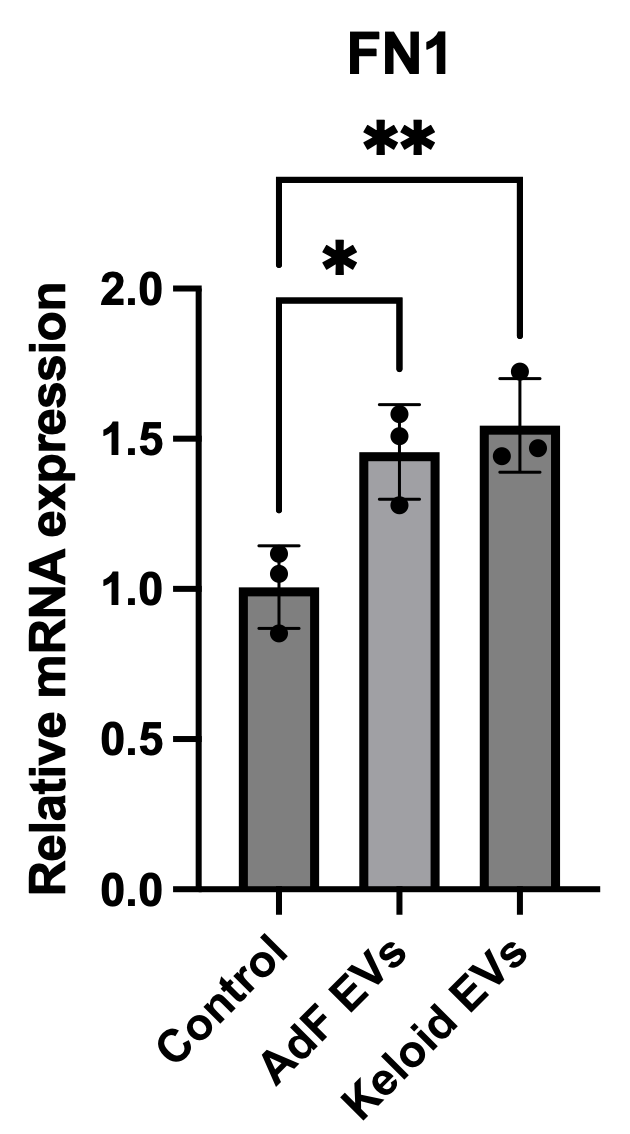

Supplement: Supplementary file 1 [file 1ff86ea913da2c457c2aa74e.docx]
