# Supplementary material
Source: Research Square preprint supplement (doi:10.21203/rs.3.rs-9195969/v1)

## Supplementary Information

CD9

E13D E17F  
EVs EVs

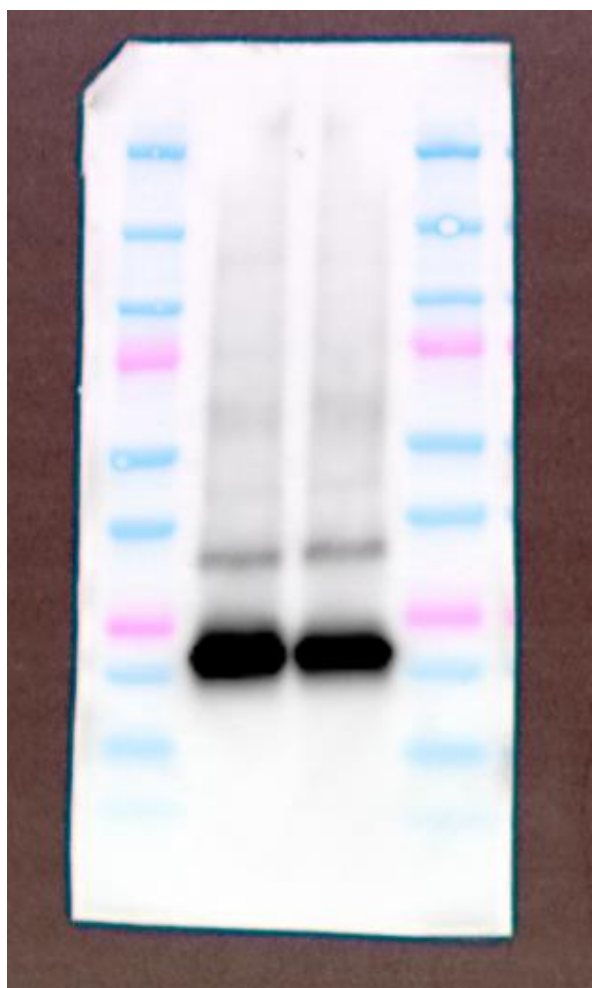

CD63

E13D E17F  
EVs EVs

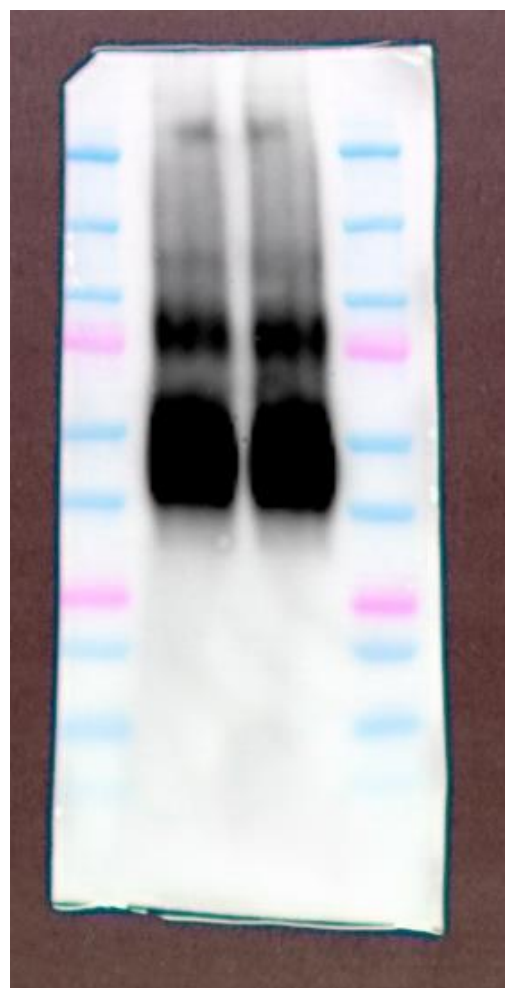

Supplement: Supplementary file 2 [file 5064a2faee7b7738e0709bd1.pdf]
